# Supplementary material for: Fmrp Interacts with Adar and Regulates RNA Editing, Synaptic Density and Locomotor Activity in Zebrafish
Source: PLoS Genet. 2015 Dec 4;11(12):e1005702. doi: 10.1371/journal.pgen.1005702 (PMC4670233; doi:10.1371/journal.pgen.1005702)
Supplement: S3 Table — Locations, strand specificity, annotations, and mmPCR results of the target-set RNA editing sites. (XLSX) [file pgen.1005702.s005.xlsx]

## Sheet: data set
F primer	R primer	Gene	Chr	Pos 0	Pos 1	Refseq	Strand	Gene part	Annotation 1	Annotation 2	Results
GAGGACCTGGTGGTGTCG	GCACCTCAGTGTCCACAGC	copa	chr2	36902890	36902891	NM_001001941	+	CDS	non syn	I --> V	√
		copa	chr2	36906457	36906458	NM_001001941.2	+	CDS	non syn	K --> R	√ off target
		copa	chr2	36902872	36902873	NM_001001941.2	+	CDS	non syn	T --> A	√ off target
TCGGAGGAAACCTGGACTC tacacggagcagcgcaaa	GTCCAACAGGCCTTGTTCAT actgccaggttaactgcactt	gria4b	chr21	21025347	21025348	NM_212752	+	CDS	syn	L --> L	√
		gria4b	chr21	21025348	21025349	NM_212752	+	CDS	non syn (splice site)	R --> G	√
		gria4b	chr21	21030158	21030159	NM_212752.1	+	CDS	non syn	N --> D	√ off target
		gria4b	chr21	21030154	21030155	NM_212752.1	+	CDS	syn	A --> A	√ off target
TTGTAGTAGCGTCACATCGGATA	AAGGGTTTGGGGATCAAGAG	blcap	chr6	51721268	51721269	NM_131493	-	CDS	non syn	K --> R	no data
		blcap	chr6	51721298	51721299	NM_131493	-	CDS	non syn	Q --> R	no editing
		blcap	chr6	51721307	51721308	NM_131493	-	CDS	non syn	Y --> C	no editing
CCGCGGAGGGAGAGTT	CTCTTGCAGACGCAGATCC	igfbp7	chr14	53721158	53721159	NM_212924	+	CDS	non syn	K --> R	insufficient samples
tgcctaacatcacgctggg	atgagggcctggacaaacg	grm6b	chr11	26572175	26572176	NM_001080020	+	CDS	syn	A --> A	no reads
GGAGCAGTCGCTCACGTT	CGCTCAGGTTTTGGGATG	grm6b	chr11	26572201	26572202	NM_001080020	+	CDS	non syn	Q --> R	no editing
CGCTGTGGACAATCTTGCT	TCCAGCCTTGGCTTCATC	cacna1da	chr11	37656952	37656953	NM_203484	-	CDS	non syn	Y --> C	√
GAGGTAACGGTGGGGAAGTT	GTTCTGTGCCGGATGAACTC	cacna1da	chr11	37656958	37656959	NM_203484.1	-	CDS	non syn	Q --> R	√ off target
		cacna1da	chr11	37656960	37656961	NM_203484	-	CDS	non syn	I --> M	√
CGCAGACTTCGCCATTAAA	TGGCGTTATGGCTGTTCA	cog3	chr9	55877519	55877520	NM_001144040	-	CDS	non syn	I --> V	no editing
		cog3	chr9	55877500	55877501	NM_001144040.1	-	CDS	non syn	E --> G	√ off target
		cog3	chr9	55875506	55875507	NM_001144040.1	-	CDS	non syn	I --> V	√ off target
ATCATTTGTGTGGAGGGAATG	CAGGCAACCTCAGGATGTG	dldh	chr25	27749600	27749601	NM_201506	-	CDS	syn	G --> G	no editing
CAGCACCGGCTCTTCTGT	GGAGGTCCGGGTTTGC	c1ql1 - similar to homo sapiens C1QL1	chr3	31533450	31533451	ENSDARG00000028521	+	predicted CDS	non syn	Q --> R	no editing
GCAGAAAGGCGCAATGTAA	TGGACAGGTGATGCTGTAGG	tmem63ba	chr13	47261522	47261523	ENSDARG00000003836	-	predicted CDS	non syn	Q --> R	no data
not tested	not tested	cadpsa - similar to homo sapiens cadps2	chr11	20438146	20438147	ENSDARG00000043661	+	predicted CDS	non syn	E --> G	no data
AACCCAACGGCACCAAC	CCTGGCTATGACAAACAGCA	grik2 (predicted)	chr16	2825702	2825703	ENSDARG00000074515	+	predicted CDS	non syn	I --> V	√
CTCCTTTCTCAACCCCCTGT	CCTGGCTATGACAAACAGCA	grik2 (predicted)	chr16	2825715	2825716	ENSDARG00000074515	+	predicted CDS	non syn	Y --> C	√
CGTGGTGGAAAACAATTTCA	CTTTGGGCATGAGCTCAGAT	grik2 (predicted)	chr16	2841997	2841998	ENSDARG00000074515	+	predicted CDS	non syn	Q --> R	no reads
ATGGTGCCCACAACCATC	AATGACGGGCACTGGAAG	kcna2 - similar to homo sapiens KCNA Protein	chr6	49359213	49359214	ENSDARG00000002241	+	predicted CDS	non syn	I --> V	no data
cacacccaagggatctgctt	ccgcactctcctttgtcgt	gria2a	chr1	20124223	20124224	NM_131894	-	CDS	non syn (splice site)	R --> G	√
		gria2a	chr1	20124224	20124225	NM_131894.1	-	CDS	syn	L--> L	√ off target
tggttttctctgggcgctt	gaaaaaccaccacacaccacc	gria2a	chr1	20120619	20120620	NM_131894.1	-	intronic	splice site	R --> G	√ off target
		gria2a	chr1	20127692	20127693	NM_131894	-	CDS	syn	S --> S	√
		gria2a	chr1	20127711	20127712	NM_131894	-	CDS	non syn	Q --> R	insufficient samples
atgtgcaacgctctcaacag	agggccatggagagacaga	si:dkey-28b4.8 Similar to Homo Sapiens ATP2A2	chr1	45114327	45114328	ENSDARG00000002840	-	CDS	syn	A --> A	SNP
ccacagatccagagagaactcc	ccgatgtttattccccacac	si:dkey-28b4.8 Similar to Homo Sapiens ATP2A2	chr1	45138958	45138959	ENSDARG00000002840	-	CDS	syn	A --> A	no editing
ctcctttgctgcaggctct	ctgggagaaagcggtctgg	cse1l	chr11	5573459	5573460	NM_201450	+	CDS	syn	L--> L	SNP
cagtgcaaagggagcgga	gagctctccaaaccctcagag	raraa	chr12	12262614	12262615	NM_131406	+	CDS	syn	L--> L	no editing
CCATTCCTGGTTCCAGTGTT	ACGGCTGATTCACTTTCAGG	flnb - similar to homo sapiens FLNB	chr11	43247591	43247592	ENSDARG00000097351	-	predicted CDS	non syn	Q --> R	no editing
tgaaagtgggcggcaatct	gtccaacaggccttgctca	gria3b	chr14	12813025	12813026	NM_198360	-	CDS	non syn (splice site)	R --> G	√
		gria3b	chr14	12813012	12813013	NM_198360.2	-	intronic	intronic	intronic	√ off target
		gria3b	chr14	12813006	12813007	NM_198360.2	-	intronic	intronic	intronic	√ off target
		gria3b	chr14	12812986	12812987	NM_198360.2	-	intronic	intronic	intronic	√ off target
		gria3b	chr14	12812981	12812982	NM_198360.2	-	intronic	intronic	intronic	√ off target
CCCTGCGACACTATGAAGGT	GCTTGTCTAAGGTGCCTTGC	gria2b	chr14	37025192	37025193	NM_131895	+	CDS	non syn (splice site)	R --> G	√
		gria2b	chr14	37025191	37025192	NM_131895.2	+	CDS	syn	L --> L	√ off target
		gria2b	chr14	37025155	37025156	NM_131895.2	+	CDS	syn	K --> K	√ off target
		gria2b	chr14	37026378	37026379	NM_131895.2	+	intronic	intronic	intronic	√ off target
tcgccacgcctaaaggatc	ctcgcccttatcgtaccacc	gria4a	chr15	43412105	43412106	NM_214806	-	CDS	non syn (splice site)	R --> G	√
		gria4a	chr15	43412106	43412107	NM_214806.1	-	CDS	syn	L --> L	√ off target
		gria4a	chr15	43398514	43398515	NM_214806.1	-	intronic	intronic	intronic	√ off target
		gria4a	chr15	43394072	43394073	NM_214806.1	-	CDS	syn	K --> K	√ off target
		gria4a	chr15	43394057	43394058	NM_214806.1	-	CDS	syn	G --> G	√ off target
		gria4a	chr15	43394051	43394052	NM_214806.1	-	CDS	syn	L --> L	√ off target
CGTCTCACTGTTGCCAGTCT	ACTTTGGCATCGATGACTCC	flna predicted	chr23	20090462	20090463	ENSDARG00000074201	+	predicted CDS	non syn	Q --> R	no reads
ggtgcccagctccagaag	ttggcacgagcagctctc	smyhc1	chr24	42244754	42244755	NM_001020507	-	CDS	syn	R --> R	SNP
aggagaagctgtgctacgtg	gtcgggcaactcgtaggac	zgc:86725	chr25	14378821	14378822	ENSDARG00000079111	+	predicted CDS	non syn	R --> G	no editing
GAACTTCAGGCCCGTATTGA	TCTCCACTTTAGCACGAGCA	MYH15 - similar to homo sapiens zinc finger proteins	chr22	336154	336155	ENSDARG00000053207	+	predicted CDS	syn	E --> E	no editing
CCGACTGTCTGGTACCCTTA	AAGGCTTGATGTTTGTGTGAAA	zfps - similar to homo sapiens zinc finger proteins	chr22	3165617	3165618	ENSDARG00000094479	+	predicted CDS	non syn	Y --> C	no editing
AGAGCGAGAGAGGCATGAAG	GCCTCCTTCAGCTGGATCT	tpm1	chr25	33916166	33916167	NM_200934	-	CDS	syn	K --> K	SNP
CACTCAATGCGGGAAAAGC	GCTCTCGTATTCCAGTGTGG	zgc:113100 zinc finger protein 570-like	chr3	62871448	62871449	NM_001031844	+	CDS	syn	T --> T	no reads
gaagcagcagggtcgaagt	acctctggggccctgtaaa	dyrk2	chr4	12522489	12522490	NM_001044833	+	CDS	syn	Q --> Q	SNP
gaacctggactccaagggc	tcagcttgtctaagatgccttgt	gria3a	chr5	25031528	25031529	NM_198339.1	-	CDS	non syn	N --> S	√
		gria3a	chr5	25031538	25031539	NM_198339.1	-	CDS	non syn	T --> A	√ off target
		gria3a	chr5	25031529	25031530	NM_198339.1	-	CDS	non syn	N --> D	√ off target
		gria3a	chr5	25031512	25031513	NM_198339.1	-	CDS	non syn	K --> E	√ off target
		gria3a	chr5	25031503	25031504	NM_198339.1	-	CDS	syn	E --> E	√ off target
		gria3a	chr5	25031481	25031482	NM_198339.1	-	CDS	non syn	K --> E	√ off target
gccaaacgacttcggcatc	cggcctgacagagaccttg	gria3a	chr5	25057895	25057896	NM_198339.1	-	CDS	non syn	Q --> R	√
		gria3a	chr5	25057891	25057892	NM_198339.1	-	CDS	syn	Q --> Q	√ off target
		gria3a	chr5	25039759	25039760	NM_198339.1	-	CDS	non syn	R --> G	√ off target
ACGAGTCCTCCTCTGTGGAA	TCATTCCCTTCCAACTGCAT	gria3a	chr5	25066153	25066154	NM_198339.1	-	CDS	non syn	I --> V	√
		gria3a	chr5	25066156	25066157	NM_198339.1	-	CDS	non syn	T --> A	√ off target
CAGCCTTCCTAGTGCTGGAT	AGAGCTCTGCTTCACTGTGG	grin1b	chr5	31256079	31256080	NM_001144131	-	CDS	non syn	Y --> C	√
gggaacatgcgtgccattc	cctgaaggaagcgatcgatga	ccnb1	chr5	55151250	55151251	NM_131513	-	CDS	syn	V --> V	√
TTTGTCCGTCACTCTCAGGA	GTCGCCAGCAGATTCATTGT	cadpsb	chr6	41366730	41366731	ENSDARG00000070567	+	predicted CDS	non syn	E --> G	no reads
TACGGTGAATCCAGGTTGTG TCTGAATCGGGTGTGTTTGA TGCCTTACTGGGTCAGTTTCT CAAGAAAAGCAGTGACCTTGC	GGTGGGACAGACAAAGGAGA CAGCCATATTCCTGGTGGAC GAAAGACATTTAGTATGAGCAGATTCA TTTATTGATGTGTGTGTGTGCTG	pxmp2	chr5	21899595	21899596	NM_001004607	-	3' UTR			√
		pxmp2	chr5	21899572	21899573	NM_001004607	-	3' UTR			√
		pxmp2	chr5	21899571	21899572	NM_001004607	-	3' UTR			√
		pxmp2	chr5	21899564	21899565	NM_001004607	-	3' UTR			√
		pxmp2	chr5	21899561	21899562	NM_001004607	-	3' UTR			√
		pxmp2	chr5	21899560	21899561	NM_001004607	-	3' UTR			√
		pxmp2	chr5	21899559	21899560	NM_001004607	-	3' UTR			√
		pxmp2	chr5	21899558	21899559	NM_001004607	-	3' UTR			√
		pxmp2	chr5	21899557	21899558	NM_001004607	-	3' UTR			√
		pxmp2	chr5	21899556	21899557	NM_001004607	-	3' UTR			√
		pxmp2	chr5	21899545	21899546	NM_001004607	-	3' UTR			√
		pxmp2	chr5	21899551	21899552	NM_001004607.1	-	3' UTR	3' UTR	3' UTR	√ off target
		pxmp2	chr5	21899549	21899550	NM_001004607.1	-	3' UTR	3' UTR	3' UTR	√ off target
gcgagtctttttctgtgggc	acgatattagcaaagccctcagat	grin1b	chr5	31237153	31237154	NM_001144131	-	3' UTR			SNP
aaagagtggcgtagatgtgatga	cgcacgctaccagtcaca	grin1b	chr5	31237474	31237475	NM_001144131	-	3' UTR			√
		grin1b	chr5	31237467	31237468	NM_001144131.1	-	3' UTR	3' UTR	3' UTR	√ off target
		grin1b	chr5	31237464	31237465	NM_001144131.1	-	3' UTR	3' UTR	3' UTR	√ off target
		grin1b	chr5	31237477	31237478	NM_001144131.1	-	3' UTR	3' UTR	3' UTR	√ off target
ACTGTCGTGAAGGGCACATT	AGCAACCTGGACCATTTCAG	grin1b	chr5	31237726	31237727	NM_001144131	-	3' UTR			no reads
TTTTCGGAAGATAAAGGTTACAGG	GTGGTTCCCCACCTCTATGA	cda	chr7	21678025	21678026	NM_001007389	+	3' UTR			√
ctttcacaccggctcacct GAACTTCAGGCCCGTATTGA CCTTCTCAAACCTTAATGTGTTTCT TTTTCGGAAGATAAAGGTTACAGG	caacaaagcaacacccccag TCTCCACTTTAGCACGAGCA TCCGAAAAATAAATGCTACAAAAA GTGGTTCCCCACCTCTATGA	cda	chr7	21677632	21677633	NM_001007389	+	3' UTR			no data
		cda	chr7	21677995	21677996	NM_001007389	+	3' UTR			no reads
		cda	chr7	21677994	21677995	NM_001007389	+	3' UTR			no reads
		cda	chr7	21677993	21677994	NM_001007389	+	3' UTR			no reads
		cda	chr7	21678000	21678001	NM_001007389	+	3' UTR			no reads
		cda	chr7	21677926	21677927	NM_001007389	+	3' UTR			no reads
		cda	chr7	21677927	21677928	NM_001007389	+	3' UTR			no reads
		cda	chr7	21677928	21677929	NM_001007389	+	3' UTR			no reads
		cda	chr7	21677931	21677932	NM_001007389	+	3' UTR			no reads
		cda	chr7	21677937	21677938	NM_001007389	+	3' UTR			no reads
		cda	chr7	21677938	21677939	NM_001007389	+	3' UTR			no reads
		cda	chr7	21677940	21677941	NM_001007389	+	3' UTR			no reads
		cda	chr7	21677941	21677942	NM_001007389	+	3' UTR			no reads
		cda	chr7	21677942	21677943	NM_001007389	+	3' UTR			no reads
acaagatcctgcaacgaagg	TTGTCCAGGTTGCGGTTT	ADARB1b	chr9	46572206	46572207	ENSDARG00000003544	+	intronic			√
		ADARB1	chr9	46572207	46572208	ENSDARG00000003544	+	intronic	intronic	intronic	√ off target
